1 **High antibody titres induced by protein subunit**  
2 **vaccines against Buruli ulcer using *Mycobacterium***  
3 ***ulcerans* antigens Hsp18 and MUL\_3720**

4  
5  
6 Kirstie M. Mangas<sup>1</sup>, Nicholas Tobias<sup>2,3</sup>, Estelle Marion<sup>3</sup>, J r mie Babonneau<sup>3</sup>, Laurent  
7 Marsollier<sup>3</sup>, Jessica L. Porter<sup>1</sup>, Sacha J. Pidot<sup>1</sup>, Chinn Yi Wong<sup>1</sup>, David C. Jackson<sup>1</sup>, Brendon Y.  
8 Chua<sup>1,\*</sup> and Timothy P. Stinear<sup>1,\*</sup>.

9  
10 <sup>1</sup> Department of Microbiology and Immunology, Doherty Institute, University of Melbourne,  
11 Melbourne, Victoria, Australia

12 <sup>2</sup> Molekulare Biotechnologie, Fachbereich Biowissenschaften, Goethe-Universit t Frankfurt,  
13 Frankfurt am Main, Germany

14 <sup>3</sup> LOEWE Centre for Translational Biodiversity in Genomics (TBG), Germany

15 <sup>4</sup> CRCINA, INSERM, Universit  de Nantes, Universit  d'Angers, Angers, France

16  
17 Corresponding Authors:

18 Timothy Stinear, University of Melbourne, 792 Elizabeth St, Melbourne, Victoria, 3000,  
19 Australia

20 Brendon Chua, University of Melbourne, 792 Elizabeth St, Melbourne, Victoria, 3000, Australia

21 Email addresses: [tstinear@unimelb.edu.au](mailto:tstinear@unimelb.edu.au), [bychua@unimelb.edu.au](mailto:bychua@unimelb.edu.au)

22

23

## 24 **Abstract**

25 **Background.** *Mycobacterium ulcerans* is the causative agent of a debilitating skin and soft tissue  
26 infection known as Buruli ulcer (BU). There is no vaccine against BU. The purpose of this study  
27 was to investigate the vaccine potential of two previously described immunogenic *M.*  
28 *ulcerans* proteins, MUL\_3720 and Hsp18, using a mouse tail infection model of BU.

29 **Methods.** Recombinant versions of the two proteins were each electrostatically coupled with a  
30 previously described lipopeptide adjuvant. Seven C57BL/6 and seven BALB/c mice were  
31 vaccinated and boosted with each of the formulations. Vaccinated mice were then challenged  
32 with *M. ulcerans* via subcutaneous tail inoculation. Vaccine performance was assessed by time-  
33 to-ulceration compared to unvaccinated mice.

34 **Results.** The MUL\_3720 and Hsp18 vaccines induced high titres of antigen-specific antibodies  
35 that were predominately subtype IgG<sub>1</sub>. However, all mice developed ulcers by day-40 post-*M.*  
36 *ulcerans* challenge. No significant difference was observed in the time-to-onset of ulceration  
37 between the experimental vaccine groups and unvaccinated animals.

38 **Conclusions.** These data align with previous vaccine experiments using Hsp18 and MUL\_3720  
39 that indicated these proteins may not be appropriate vaccine antigens. This work highlights the  
40 need to explore alternative vaccine targets and different approaches to understand the role  
41 antibodies might play in controlling BU.

42

## 43 **Introduction**

44 Buruli ulcer (BU) is a disease caused by *Mycobacterium ulcerans*. *M. ulcerans* infects  
45 subcutaneous tissue and commonly presents as a skin nodule (in Africa) or papule (in Australia),  
46 sometimes accompanied by redness; however, oedema is another common initial presentation.  
47 As the disease progresses the skin around the infected area breaks down and an ulcer develops  
48 [1, 2]. Ulcers typically present with deep undermined edges and have a necrotic core comprised  
49 of slough of bacteria, dead skin and immune cells [3, 4]. Infections are rarely fatal but untreated  
50 ulcers can destroy fat tissue, blood vessels, muscles and bone [5, 6].

51  
52 The transmission of BU is likely caused by the introduction of *M. ulcerans* beneath the skin. This  
53 could be achieved through the puncture of *M. ulcerans*-contaminated skin (with examples in the  
54 literature of infections following human bite, bullet and land mine wounds, or vaccination) or by  
55 the introduction of *M. ulcerans* contaminated objects into the subcutaneous tissue, such as  
56 following insect bites [7-9]. BU endemic areas are focused in certain rural regions across west,  
57 sub-Saharan and central Africa, including Nigeria, Ghana, Togo, Cameroon, Benin, Democratic  
58 Republic of Congo and Côte d'Ivoire. The disease also occurs in Australia – primarily on the  
59 Bellarine and Mornington Peninsulas near the major metropolitan centre of Melbourne [10-12].  
60 The disease can affect all age groups and ethnicities [13]. In Australia, ulcers are predominately  
61 reported on upper (27%) and lower limbs (70%) [14].

62  
63 *M. ulcerans* is a slow-growing bacterium, with a doubling time of greater than 48 hours. As such,  
64 symptoms of BU can take months to appear after primary infection. If diagnosed early, BU can  
65 be treated effectively by combination antibiotic therapy [15]. Unfortunately, in many cases the  
66 disease can initially be misdiagnosed as other more common skin infections [16, 17]. Delayed

67 diagnosis and treatment can lead to extensive lesions that leave victims with life-long  
68 disfigurement and disability. Reparative surgery is often required for severe cases [18]. A  
69 retrospective study in Australia showed that most diagnoses (87%) occurred once ulceration has  
70 been reached [19] and in Ghana 66% cases were diagnosed with active lesions [20]. There is  
71 currently no protective treatment for BU and no distinct mechanism of transmission.  
72 Furthermore, treatment can be difficult to access for those in rural areas. Thus, there is a need to  
73 develop an effective vaccine to protect those particularly in highly endemic areas.

74

75 The *M. bovis* 'BCG' vaccine has been shown to delay the onset of BU symptoms and decrease  
76 bacterial load in both experimental animal BU infection models and in studies of human  
77 populations [21-25]. Therefore, the BCG vaccine is the benchmark for assessing potential *M.*  
78 *ulcerans* vaccines. Some studies have assessed the efficacy of putative BU vaccines although  
79 none have reached clinical trials [21, 22, 26-37]. All these vaccines were tested in murine  
80 challenge models and were not capable of preventing the eventual onset of disease.

81

82 One approach to vaccination is to use antigens specific for a specific pathogen (e.g. certain  
83 proteins(s) that are recognized by the immune system and induce neutralizing antibodies [38,  
84 39]. For rapid immune recognition these proteins would ideally be cell surface associated. Two  
85 *M. ulcerans* proteins MUL\_3720 and Hsp18 have been identified as potential candidates for  
86 vaccine antigens. Hsp18 is a protein associated with biofilm formation and *M. ulcerans*-infected  
87 individuals produce antibodies against Hsp18 [40, 41]. MUL\_3720 is a highly expressed cell-  
88 wall associated protein with a putative role in cell-wall biosynthesis [42, 43].

89

90 As protein antigens may be poorly immunogenic on their own, adjuvants are used to enhance  
91 antigenic potency. A lipopeptide adjuvant known as R<sub>4</sub>Pam<sub>2</sub>Cys has been found to increase  
92 antigen uptake, increase dendritic cell trafficking to lymph nodes and enhance antibody  
93 production against antigens derived from pathogens including influenza and hepatitis C in  
94 murine models [44-47].

95

96 The aim of this study was to try to develop a preventative vaccine against Buruli ulcer,  
97 comprising two highly expressed cell-wall associated proteins, MUL\_3720 or Hsp18, bound to  
98 an R<sub>4</sub>Pam<sub>2</sub>Cys-based lipopeptide adjuvant.

99

## 100 **Materials & Methods**

### 101 *Strains and culture conditions*

102 *Escherichia coli* Rosetta2 containing plasmid pET30b-Hsp18 (strain TPS681) or pDest17-  
103 MUL\_3720 (strain TPS682) was grown at 37°C in Luria-Bertani (LB) broth (Difco, Becton  
104 Dickinson, MD, USA) supplemented with 100 µg/ml ampicillin (Sigma-Aldrich, USA) or 50  
105 µg/ml kanamycin to express 6xHIS-tagged Hsp18 or MUL\_3720 recombinant protein.  
106 *Mycobacterium ulcerans* (strain Mu\_1G897) was grown at 30°C in 7H9 broth or 7H10 agar  
107 (Middlebrook, Becton Dickinson, MD, USA) supplemented with oleic acid, albumin, dextrose  
108 and catalase growth supplement (OADC) (Middlebrook, Becton Dickinson, MD, USA), and  
109 0.5% glycerol (v/v). *M. bovis* BCG (strain Sanofi Pasteur) used for vaccinations was grown at  
110 37°C in 7H9 broth or 7H10 agar supplemented with OADC. Mycobacterial colony counts from  
111 cultures or tissue specimens were performed using spot plating as previously described [48].

112

### 113 *Recombinant protein expression*

114 Overnight cultures of strains TPS681 and TPS682 were diluted to OD<sub>600</sub> = 0.05 in LB broth. Each  
115 culture was incubated at 37°C with shaking at 200 rpm until OD<sub>600</sub> = 0.6-0.7, then 1 mM IPTG  
116 (Isopropyl β-D-1-thiogalactopyranoside) was added to induce protein expression. The cells were  
117 incubated for a further four hours to express the protein. To harvest the protein, cells were  
118 resuspended in wash buffer (8 M urea, 150 mM sodium chloride, 10% glycerol) and sonicated at  
119 amplitude 60 (QSonica Ultrasonic Liquid Processor S-4000, Misonix) until the solution turned  
120 clear. The lysate was filtered with a 0.22 µm filter (Millipore) to remove cellular debris and the  
121 protein was column-purified using anti-histidine resin (ClonTech). The resin was washed ten  
122 times with 10x column volumes of wash buffer mixed with an increasing proportion of Tris  
123 buffer (20 mM Tris-HCl, 150 mM sodium chloride, 10% glycerol) until the column was washed

124 with only tris buffer. The resin was washed a further two times with tris buffer containing 20  
125 mM imidazole. Protein was eluted in tris buffer containing 200 mM imidazole and dialysed in  
126 phosphate buffered saline (PBS) before concentration using a 3K MWCO PES concentration  
127 column (Pierce).

128

### 129 *Sodium dodecyl sulphate polyacrylamide gel electrophoresis (SDS-PAGE)*

130 Samples were denatured in an equal volume of 2 x sample loading buffer (40% (v/v) 0.5M Tris-  
131 HCL pH 6.8, 10% glycerol, 1.7% (w/v) SDS, 10% 2- $\beta$ -mercaptoethanol, 0.13% (w/v)  
132 bromophenol blue in distilled water) at 100°C for 5 minutes. Ten microlitres of each sample and  
133 SeeBlue® Plus2 pre-stained protein standard (Invitrogen) were loaded into a 0.5mm 12%  
134 polyacrylamide gel under reducing conditions, as previously described [49]. The gel was run in  
135 running buffer (0.3% (w/v) Tris, 1.44% (w/v) glycine and 0.1% (w/v) SDS in distilled water) for  
136 1 hour at 150 volts (Mini-protean vertical electrophoresis cell, Bio-Rad). The gels were stained  
137 in Coomassie stain (45% methanol, 10% acetic acid 0.25% (w/v) Coomassie brilliant blue in  
138 distilled water) for 1 hour and destained in Coomassie destain (33% Methanol, 10% acetic acid,  
139 60% distilled water) until the protein bands could be identified.

140

### 141 *Western Blotting*

142 Proteins were separated on a 12% polyacrylamide gel as per the method for SDS-PAGE. After  
143 separation proteins were transferred to a nitrocellulose membrane in tris-glycine transfer buffer  
144 (1.5 mM Tris, 12mM glycine, 15 % methanol (v/v) in distilled water) for 1 hour at 100 volts  
145 (Mini Trans-Blot Cell, Bio-Rad). The nitrocellulose membrane was blocked in blocking buffer  
146 (5% (w/v) skim milk powder and 0.1% Tween-20 in PBS) overnight at 4°C. The membrane was

147 incubated in blocking buffer containing anti-6xHIS-HRP antibody (Roche Applied Science) at  
148 1:500 dilution. The membrane was washed in PBS containing 0.1% Tween-20 and then exposed  
149 to developing solution (Western Lighting Chemiluminescence kit, Perkin Elmer) according to  
150 manufacturer's guidelines. Chemiluminescence was detected using an MF ChemiBIS gel  
151 imaging system (DNR Bio-Imaging Systems).

152

### 153 *Analysis of electrostatic interaction between protein antigen and lipopeptide formulations*

154 The association between each protein and R<sub>4</sub>Pam<sub>2</sub>Cys was measured by mixing 25 µg of protein  
155 with increasing amounts of lipopeptide in 50 µl PBS in a 96-well plate (Nunc, Thermo  
156 Scientific). The formation of protein-lipopeptide complexes through electrostatic interaction was  
157 measured by an increase in light absorbance. Plates were read at dual wavelengths of 505 and  
158 595 nm on plate reader (LabSystems Multiskan Multisoft microplate reader).

159

### 160 *Lipopeptide vaccine preparation*

161 Each vaccine dose contained 25 µg protein added to R<sub>4</sub>Pam<sub>2</sub>Cys at a ratio of 1:5 mole of protein  
162 to lipopeptide. PBS was added to a final volume of 100 µl and the combination sonicated in a  
163 water bath for 30 seconds. Control vaccine preparations were made containing 25 µg protein  
164 alone or R<sub>4</sub>Pam<sub>2</sub>Cys lipopeptide alone and sonicated before administration.

165

### 166 *Ethics statement for animal experiments*

167 All animal experiments were performed in full compliance with national guidelines (articles  
168 R214-87 to R214-90 from French "rural code") and European guidelines (directive 2010/63/EU  
169 of the European Parliament and of the council of September 22, 2010 on the protection of



170 animals used for scientific purposes). All protocols were approved by the Ethics Committee of  
171 region Pays de la Loire under protocol nos. CEEA 2009.14 and CEEA 2012.145. Animals were  
172 maintained under specific pathogen-free conditions in the animal house facility of the Centre  
173 Hospitalier Universitaire, Angers, France (agreement A 49 007 002). Six-week old female  
174 C57BL/6 and BALB/c mice were obtained from Charles River Laboratories (Saint-Germain-  
175 Nuelles, France) and housed at CHU Angers. Food and water were given *ad libitum*.

176

177

#### 178 *Vaccination of animals*

179 The synthesis and purification of the branched cationic lipopeptide, R<sub>4</sub>Pam<sub>2</sub>Cys, was performed  
180 as previously described [45, 50, 51]. Each vaccine dose contained 25 µg protein formulated in  
181 PBS with R<sub>4</sub>Pam<sub>2</sub>Cys at a 1:5 molar ratio of protein to lipopeptide in a final volume of 100 µl.  
182 The protein alone control formulation contained 25 µg protein per dose diluted in PBS. The  
183 R<sub>4</sub>Pam<sub>2</sub>Cys alone formulations contained the same amount of lipopeptide used in each of the  
184 protein + adjuvant formulations, calculated by the 1:5 molecular ratio (with the omission of the  
185 protein from the solution). The R<sub>4</sub>Pam<sub>2</sub>Cys alone formulations were diluted to the correct  
186 concentration in PBS. Live-attenuated *M. bovis* BCG strain ‘Sanofi Pasteur’ was grown to log  
187 phase and stored at -80°C in 20% glycerol until use. Bacteria were washed with PBS and  
188 resuspended in 200µl, before administration at 4.7 x 10<sup>5</sup> bacteria per dose. All vaccines and  
189 control formulations were sonicated for 5 minutes in a waterbath sonicator before being  
190 administered.

191

192

193 For vaccination using R<sub>4</sub>Pam<sub>2</sub>Cys, animals were inoculated subcutaneously at the base of tail  
194 (100µl per dose at 50 µl per flank) and boosted 21 days later with the same formulations. Mice  
195 vaccinated with approximately 1 x 10<sup>3</sup> CFU *M. bovis* BCG resuspended in PBS at the base of tail  
196 (100 µl per dose at 50µl per flank).

197

#### 198 *M. ulcerans* challenge

199 Mice were challenged on day 35 by subcutaneous injection on the tail with 1 x 10<sup>4</sup> CFU *M.*  
200 *ulcerans* (Mu\_1G897) resuspended in 50 µl PBS. Mice were allowed to recover and monitored  
201 for up to 40 days after infection and euthanised when tail ulceration was observed wherein sera  
202 were obtained for immunological analysis.

203

#### 204 *Serum antibody titre measurements*

205 Serum was prepared from blood obtained from mice at day 0, day 18, day 33 and day 63.  
206 Antibody titres were measured using enzyme linked immunosorbent assay (ELISA) as per  
207 methods described in [45]. Briefly, ELISA plates (Nunc, Thermo Scientific) were coated  
208 overnight with 5 µg protein diluted in PBSN<sub>3</sub> and blocked with BSA<sub>10</sub>PBS for 2 hours at room  
209 temperature. Plates were washed with PBS containing 0.05% Tween-20 (PBST). Neat sera were  
210 sequentially diluted in BSA<sub>5</sub>PBST and incubated at room temperature for 6 hours. Bound  
211 antibody was detected by adding horse radish peroxidase conjugated rabbit anti-mouse IgG  
212 (Dako, Glostrup, Denmark) at a concentration of 1:400 in BSA<sub>5</sub>PBST for 2 hours. Plates were  
213 developed with developing solution (hydrogen peroxide, citric acid and ABTS) and incubated for  
214 10-15 min with gentle agitation to observe a colour change. The reaction was stopped with 50

215 mM sodium fluoride. Plates were read at dual wavelengths of 505 and 595 nm on plate reader  
216 (LabSystems Multiskan Multisoft microplate reader).

217

### 218 *Statistical analysis*

219 Graphpad Prism software (GraphPad Software v7, CA, USA) was used to perform statistical  
220 analyses on the antibody titre. Antibody titres were analysed using two-way ANOVA with  
221 Tukey's correction for multiple comparisons. The time to ulceration data were displayed as a  
222 Kaplan-Meier plot and statistical significance was determined using a Log-Rank (Mantel-Cox)  
223 test. For all tests  $*p < 0.05$ ,  $**p < 0.01$  and  $***p < 0.001$  and  $****p < 0.0001$  were considered  
224 statistically significant.

225

226

## 227 **Results**

228 MUL\_3720 and Hsp18 have previously been shown to be immunogenic and cell-wall associated  
229 [40, 43]. The adjuvant Pam<sub>2</sub>Cys has been shown to induce strong antibody responses to proteins  
230 from infectious agents such as influenza and hepatitis C [52-54]. Therefore, this study measures  
231 the ability of MUL\_3720 and Hsp18 based vaccines, incorporating the adjuvant Pam<sub>2</sub>Cys, to  
232 generate protein-specific antibodies and to protect against BU.

233

### 234 **Recombinant MUL\_3720 and Hsp18 both bound to R<sub>4</sub>Pam<sub>2</sub>Cys**

235 Recombinant MUL\_3720 and Hsp18, expressed from inducible *E. coli* expression vectors, were  
236 prepared for use as antigens in the vaccine formulations (Table S1). Purification of the  
237 recombinant proteins was confirmed by SDS-PAGE and Western blot analyses of the eluate (Fig.  
238 1). DLS analysis was then performed to identify whether recombinant MUL\_3720 or Hsp18  
239 would electrostatically bind to either the positively charged lipopeptide adjuvant R<sub>4</sub>Pam<sub>2</sub>Cys, or

240 its negatively charged counterpart, E<sub>8</sub>Pam<sub>2</sub>Cys. The optical density of solutions containing these  
241 constituents at a wavelength of 450nm (OD<sub>450</sub>) is related to the particle size of molecules in  
242 solution, reflecting the strength of the ionic interaction between protein and lipopeptide [45].  
243 MUL\_3720 preferentially bound to R<sub>4</sub>Pam<sub>2</sub>Cys compared to E<sub>8</sub>Pam<sub>2</sub>Cys (Fig. 2A). This is  
244 shown as a gradual increase in optical density following the addition of increasing amounts of  
245 R<sub>4</sub>Pam<sub>2</sub>Cys to a constant amount of MUL\_3720. At a 5-fold molar excess of protein to  
246 lipopeptide the OD<sub>450</sub> plateaued, suggesting MUL\_3720 bound most strongly to R<sub>4</sub>Pam<sub>2</sub>Cys at a  
247 1:5 protein to lipopeptide ratio. Conversely, when E<sub>8</sub>Pam<sub>2</sub>Cys was added to MUL\_3720 the  
248 optical density remained static and did not increase with increasing lipopeptide concentrations,  
249 indicating a lack of binding. Hsp18 also appeared to bind preferentially to R<sub>4</sub>Pam<sub>2</sub>Cys and also at  
250 a 1:5 ratio of Hsp18 to R<sub>4</sub>Pam<sub>2</sub>Cys (Figure 2B). Therefore, two protein-adjuvant formulations  
251 were prepared using MUL\_3720 with R<sub>4</sub>Pam<sub>2</sub>Cys and Hsp18 with R<sub>4</sub>Pam<sub>2</sub>Cys, both at a 1:5  
252 protein to lipopeptide molar ratio.

253

## 254 **Vaccination induced strong protein-specific antibody responses**

255 Prior to challenge with *M. ulcerans*, the ability of the vaccine candidates to generate murine  
256 immune responses was assessed. ELISAs were utilized to measure the antibody (IgG) titres in  
257 sera obtained from two strains of mice (BALB/c and C57BL/6) immunized with either  
258 MUL\_3720 + R<sub>4</sub>Pam<sub>2</sub>Cys or Hsp18 + R<sub>4</sub>Pam<sub>2</sub>Cys after the primary vaccination dose (day 18)  
259 and a secondary dose (day 33).

260

261 Vaccination with MUL\_3720 recombinant protein alone or MUL\_3720 + R<sub>4</sub>Pam<sub>2</sub>Cys were  
262 capable of inducing MUL\_3720-specific antibody titres in both BALB/c and C57BL/6 strains of

263 mice (Fig. 3A, B). Primary vaccination with MUL\_3720 protein alone induced MUL\_3720-  
264 specific antibody responses that significantly increased ( $p < 0.0001$ ) following a vaccine boost ( $p$   
265 = 0.0234). Additionally, MUL\_3720 + R<sub>4</sub>Pam<sub>2</sub>Cys generated MUL\_3720 specific antibody  
266 responses after primary vaccination ( $p < 0.0001$  in BALB/c and C57BL/6), which were increased  
267 after the secondary boost ( $p < 0.0001$  in BALB/c and not statistically significant in C57BL/6).  
268 The titres after the boost in particular were greater than MUL\_3720 alone vaccination ( $p =$   
269 0.0031 in BALB/c and  $p = 0.006$  in C57BL/6). Mice that were not vaccinated with recombinant  
270 MUL\_3720 (R<sub>4</sub>Pam<sub>2</sub>Cys alone and BCG) did not have an increase in MUL\_3720-specific  
271 antibodies compared to naïve mice.

272

273 Vaccination with Hsp18 recombinant protein alone or Hsp18 + R<sub>4</sub>Pam<sub>2</sub>Cys induced Hsp18-  
274 specific antibody titres in both strains of mice (Fig. 3C, D). Vaccine boost with Hsp18  
275 recombinant protein alone induced significantly higher Hsp18-specific antibody responses in  
276 BALB/c mice compared to a single vaccination with Hsp18 protein ( $p < 0.0001$ ). Boosting with  
277 protein alone in C57BL/6 did not significantly increase antibody titres. Hsp18 + R<sub>4</sub>Pam<sub>2</sub>Cys  
278 induced Hsp18-specific antibody responses in both mouse strains after primary vaccination ( $p <$   
279 0.0001 in BALB/c and  $p = 0.0165$  in C57BL/6) and the Hsp18-specific antibody titre  
280 significantly increased after booster vaccination ( $p < 0.0001$  in BALB/c and  $p = 0.0016$  in  
281 C57BL/6). In all strains, the antibody titres induced by Hsp18 + R<sub>4</sub>Pam<sub>2</sub>Cys were significantly  
282 higher than vaccination with Hsp18 protein alone ( $p = 0.0004$  in BALB/c and  $p < 0.0001$  in  
283 C57BL/6) (Fig. 3C, D) with negligible levels of antibodies seen in mice vaccinated with only  
284 R<sub>4</sub>Pam<sub>2</sub>Cys, or BCG.

285

286 **Measurement of IgG antibody subtypes following MUL\_3720 + R<sub>4</sub>Pam<sub>2</sub>Cys and Hsp18 +**  
287 **R<sub>4</sub>Pam<sub>2</sub>Cys vaccination**

288 Quantifying levels of IgG antibody shows that the predominant isotypes produced by  
289 MUL\_3720 were IgG<sub>1</sub> and IgG<sub>2b</sub> (Fig. 3E) with no significant difference between these isotype  
290 titres. Vaccination with MUL\_3720 + R<sub>4</sub>Pam<sub>2</sub>Cys produces significantly more IgG<sub>1</sub> and IgG<sub>2b</sub>  
291 antibodies ( $p = 0.0076$ ). The antibody titres for both isotypes were highest prior to infection with  
292 *M. ulcerans* (day 33) and decreased after infection by day 63. This vaccine was capable of  
293 inducing IgG<sub>2a</sub> antibodies, which was detected also on day 33, however in smaller amounts than  
294 IgG<sub>1</sub> and IgG<sub>2b</sub> ( $p = 0.0399$  for MUL\_3720 + R<sub>4</sub>Pam<sub>2</sub>Cys) (Fig. 3E).

295

296 Similar to vaccination with MUL\_3720, Hsp18 was also capable of inducing strong IgG  
297 antibody titres. The predominant isotype was IgG<sub>1</sub> which Hsp18 + R<sub>4</sub>Pam<sub>2</sub>Cys elicited more than  
298 any other isotype (Fig. 3F) including IgG<sub>2a</sub> and IgG<sub>2b</sub>. Again, these titres was highest at day 33  
299 and decreased significantly after infection on day 63. This trend was also observed after  
300 vaccination with Hsp18 alone ( $p = 0.0018$  vs IgG<sub>2a</sub> and  $p = 0.0076$  vs IgG<sub>2b</sub>, respectively at day  
301 33).

302

303 **MUL\_3720 + R<sub>4</sub>Pam<sub>2</sub>Cys and Hsp18 + R<sub>4</sub>Pam<sub>2</sub>Cys do not protect against the onset of BU**

304 As both vaccines were capable of inducing protein-specific antibody responses, they were tested  
305 in a murine challenge model to measure their protective efficacy. Efficacy was measured by time  
306 delay to the onset of ulceration in a mouse tail infection model. There are a progression of  
307 clinical symptoms for Buruli ulcer in this model (Fig. 4). Once ulceration has been reached the

308 disease would likely continue until the tail became necrotic. Therefore, the experimental  
309 endpoint was deemed to be the point of ulceration.

310

311 After the scheduled vaccinations, mice were challenged via subcutaneous tail inoculation with 1  
312  $\times 10^4$  CFU of *M. ulcerans* and observed for up to 40 days. In BALB/c and C57BL/6 mice there  
313 was no significant difference between the time to ulceration between control mice (mice not  
314 vaccinated with recombinant protein, such as R<sub>4</sub>Pam<sub>2</sub>Cys alone and BCG) and mice vaccinated  
315 with either MUL\_3720 + R<sub>4</sub>Pam<sub>2</sub>Cys or Hsp18 + R<sub>4</sub>Pam<sub>2</sub>Cys (Figure 5A and 5B). There was  
316 also no significant difference in the time to ulceration between mice that were vaccinated with  
317 MUL\_3720 + R<sub>4</sub>Pam<sub>2</sub>Cys or Hsp18 + R<sub>4</sub>Pam<sub>2</sub>Cys and BCG, the benchmark for mycobacterial  
318 vaccine efficacy. Signs of infection in all BALB/c and C57BL/6 mice were visible by day 33  
319 (Table 1 and Table 2) and all mice reached ulceration by day 63, 30 days post-*M. ulcerans*  
320 challenge (Fig. 5A, B).

321

### 322 **Antibody titres do not correlate with protection against *M. ulcerans***

323 High antibody titres were observed in all mice vaccinated with either recombinant MUL\_3720 or  
324 Hsp18, particularly in the secondary response after booster vaccination (Fig. 3A-D) prior to *M.*  
325 *ulcerans* challenge. However, mice vaccinated with protein alone or protein plus lipopeptide  
326 adjuvant all succumbed to infection by day 75. The sera from mice at the day 63 was used to  
327 quantify antibody titres during infection. At day 63 all mice still had detectable protein-specific  
328 antibodies against the recombinant protein with which they were vaccinated (Figure 3A-3D). In  
329 BALB/c mice (Fig. 3A, C) the antibody titres at day 63 were lower than after the secondary  
330 response prior to challenge ( $p < 0.0001$  for both Hsp18 + R<sub>4</sub>Pam<sub>2</sub>Cys and MUL\_3720 +

331 R<sub>4</sub>Pam<sub>2</sub>Cys) but remained significantly higher than at day 0 ( $p < 0.0001$  for both Hsp18 +  
332 R<sub>4</sub>Pam<sub>2</sub>Cys and MUL\_3720 + R<sub>4</sub>Pam<sub>2</sub>Cys). In C57BL/6 mice (Fig. 3B and 3D), antibody titres  
333 against MUL\_3720 or Hsp18 from mice vaccinated with either protein alone or protein plus  
334 lipopeptide adjuvant were also significantly decreased at day 63 compared to the secondary  
335 response at day 35 ( $p < 0.0001$  and  $p = 0.0406$  for MUL\_3720 + R<sub>4</sub>Pam<sub>2</sub>Cys and Hsp18 +  
336 R<sub>4</sub>Pam<sub>2</sub>Cys, respectively). Similar to BALB/c mice, the day 63 respective protein-specific  
337 antibodies for MUL\_3720 + R<sub>4</sub>Pam<sub>2</sub>Cys and Hsp18 + R<sub>4</sub>Pam<sub>2</sub>Cys were significantly higher than  
338 at day 0 ( $p < 0.0001$  and  $p = 0.0004$  for MUL\_3720 + R<sub>4</sub>Pam<sub>2</sub>Cys and Hsp18 + R<sub>4</sub>Pam<sub>2</sub>Cys,  
339 respectively).

340

341 **Challenge with *M. ulcerans* did not induce protein-specific antibody levels comparable to**  
342 **vaccination with MUL\_3720 or Hsp18.**

343 MUL\_3720 and Hsp18 recombinant proteins are immunogenic and capable of inducing protein-  
344 specific antibody responses after vaccination. However, only minor detectable antibody  
345 responses against either recombinant MUL\_3720 or Hsp18 at day 63 (Fig. 3A-D) were found in  
346 mice vaccinated with R<sub>4</sub>Pam<sub>2</sub>Cys alone or BCG then challenged with *M. ulcerans*. These  
347 responses are much lower than the protein-specific antibody responses generated from  
348 MUL\_3720 or Hsp18 vaccinated mice, particularly in C57/BL6 mice ( $p < 0.0001$ ) (Fig. 6).  
349 Animals from both mouse strains that were vaccinated with R<sub>4</sub>Pam<sub>2</sub>Cys alone or BCG showed  
350 no increase in protein-specific antibody responses against either recombinant MUL\_3720 and  
351 Hsp18 on day 63 post-*M. ulcerans* challenge (Fig. 3A-D), even though these two proteins are  
352 both expressed in *M. ulcerans*.

353



## 354 Discussion

355 This study aimed to develop a vaccine against *M. ulcerans* utilizing two previously described  
356 cell-wall associated proteins, Hsp18 and MUL\_3720 [40-43]. Both the MUL\_3720 and Hsp18-  
357 based vaccines were capable of inducing high antibody titres, but these responses were not  
358 associated with protection (Fig. 5). This may indicate that these proteins, while strongly  
359 immunogenic, play no major role in pathogenesis, so targeting them with potentially neutralizing  
360 antibodies induced by the vaccine has no impact on disease. Alternatively, antibodies raised by  
361 these vaccines may not have had the functional potential to control infection. In addition to  
362 antigen binding, antibodies engage via their Fc domains with Fc $\gamma$  receptors (Fc $\gamma$ R) present on  
363 innate immune cells (NK cells, monocytes, macrophages and neutrophils) to rapidly recruit the  
364 anti-microbial activity of the innate immune system. Antibodies with these functions can  
365 promote control of a pathogen through the activation of multiple effector cell functions,  
366 including Ab dependent cellular cytotoxicity, cellular phagocytosis and/or cytokine and enzyme  
367 secretion [55-57]. Recent research has shown that mice lacking antibodies have increased  
368 susceptibility to *M. tuberculosis* infection [58] and non-human primates treated to deplete B cells  
369 also exhibit increased bacterial burden [59]. Despite the findings of this research, it is likely that  
370 B cells and antibody responses still play a role in controlling *M. ulcerans* infection in this model,  
371 albeit with different specificities. Future research could use human BU patient cohorts and  
372 mouse infection models to attempt to characterize the targets, functional and structural aspects of  
373 antibody responses that differentiate subjects able to control BU from susceptible subjects. It  
374 might then be possible to use B cell probe technologies to isolate Ag-specific memory B cells  
375 from individuals that control *M. ulcerans* infection and then clone the immunoglobulin gene  
376 sequences identified [60]. Antigen-specific monoclonal Abs (mAbs) could then be generated and

377 characterized for their *in vitro* anti-microbial activity and used in *in vivo* mouse passive transfer  
378 studies to determine potential use as mAb therapeutics against BU.

379

380 Another explanation for the ineffectiveness of antibodies in this study may be due to the  
381 localized immune suppression induced by the *M. ulcerans* toxin mycolactone at the site of  
382 infection. Mycolactone diffuses into tissue surrounding the bacteria [61-63]. Mycolactone is a  
383 cytotoxin that modulates the function of several immune cells [63, 64]. The toxin inhibits the  
384 Sec61 translocon, affecting T cell activation, impairing T cell responsiveness and distorting  
385 cytokine production [62, 63]. The mycolactone-induced depletion of T cell homing to peripheral  
386 lymph nodes affects subsequent B-cell activation and migration from the lymphatics [65]. The  
387 antibodies induced by the vaccine in this study may be functional but unable to access bacteria  
388 within the infection or it may be that multiple effector cell functions have been modulated by  
389 mycolactone exposure through interference with receptor expression on key innate immune cells,  
390 rendering these cells poorly responsive to antibodies. Suppression of protein-specific antibody  
391 production in the presence of mycolactone has been observed [66]. Mycolactone administered to  
392 a different location to the antigen caused no reduction to systemic antigen-specific IgG titres  
393 [66], similar to the observations from our study.

394

395 The greatest antibody responses were of the IgG1 subclass. Typical antibody responses against  
396 proteins occur via B cell isotype switching from IgM (non-specific antibody isotype) to IgG.  
397 There are 4 subclasses of IgG (IgG1, IgG2, IgG3 and IgG4) and isotype switching to  
398 predominantly IgG1 suggests refinement of immune responses to respond specifically to either  
399 MUL\_3720 or Hsp18, as IgG1 is capable of binding to protein antigens [67]. IgG1 can also bind

400 all forms of Fc $\gamma$ R which is required to elicit and mediate effector immune functions as described  
401 above [68]. The presence of IgG2 suggest further isotype switching from IgG1 to IgG2<sub>a/b</sub> as the  
402 immune response develops. IgG2 is less effective at inducing phagocytosis and fixing  
403 complement and is more commonly associated with polysaccharide antigens. Though tests on the  
404 recombinant proteins had undetectable levels of lipopolysaccharide (LPS), there could be trace  
405 amounts from the *E. coli* expression vector boosting IgG2 responses. Studies analysing  
406 antibodies generated during leprosy and TB infection show a switch from IgG1 to IgG2  
407 antibodies for leprosy and a persistence of IgG1 and IgG3 antibodies for TB [69]. As isotype  
408 switching of antibodies requires help by T helper cells, future work could therefore also  
409 incorporate studies on the effect of vaccination and subsequent *M. ulcerans*-infection on T cells  
410 as well as antibody responses.

411  
412 In this study, all mice succumbed to infection in a relatively short period (40 days) compared to  
413 previous mouse tail infection models [70] and human BU, where the incubation period is  
414 estimated at 4.8 months before the onset of ulceration [71]. All BALB/c and C57BL/6 mice  
415 succumbed to infection by 40 days after MU infection, even mice that were vaccinated by *M.*  
416 *bovis* BCG. *M. bovis* BCG has been previously shown to delay the onset of disease on average  
417 by at least 6 weeks [21, 22, 31]. In this study however, there was no significant difference  
418 between mice vaccinated with either MUL\_3720 or Hsp18 protein alone or with both proteins  
419 plus R<sub>4</sub>Pam<sub>2</sub>Cys. This suggests that *M. bovis* BCG is ineffective at protecting mice in this model  
420 of *M. ulcerans* vaccination. This failure to observe any protective impact of *M. bovis* BCG might  
421 be a reflection of the challenge strain of *M. ulcerans* used (strain Mu\_1G897) and/or the high  
422 challenge dose used (10<sup>4</sup> bacteria). High concentrations (>10<sup>4</sup> bacteria) have not been reported in

423 environmental sources of *M. ulcerans* [9, 72-75], consistent with the hypothesis that a relatively  
424 small bacterial inoculum is required to establish BU [9]. At the time this study was conducted the  
425 minimum infectious dose (ID<sub>50</sub>) for BU had not been determined, however the ID<sub>50</sub> has since  
426 been identified as approximately 3 CFU [48]. Future studies should therefore use a murine model  
427 that is more representative of a natural *M. ulcerans* infection, reflected both in the mode of *M.*  
428 *ulcerans* entry into the subcutaneous tissue and in the dose of bacteria used for challenge.

429

## 430 **Conclusions**

431 Vaccination with either MUL\_3720 or Hsp18 proteins induced high antibody titres. These  
432 responses were augmented when either protein was linked with the lipopeptide adjuvant  
433 R<sub>4</sub>Pam<sub>2</sub>Cys. However, robust antibody responses did not correlate with protection against  
434 challenge with *M. ulcerans*. Future work could test different *M. ulcerans* antigens in vaccine  
435 formulations against Buruli ulcer. As mycolactone is a key virulence factor, neutralising this  
436 toxin early in infection by targeting the PKS enzymes required for its biosynthesis could be a  
437 focus for future vaccination developments. Using a low *M. ulcerans* inoculum as a more realistic  
438 vaccine challenge dose is also warranted.

439

## 440 **Acknowledgements**

441 We thank Roy Robins-Browne for providing the pET-30b MOD plasmid used for the expression  
442 of recombinant Hsp18.

443

## 444 References

- 445 1. Guarner, J., et al., *Histopathologic features of Mycobacterium ulcerans infection*. Emerg  
446 Infect Dis, 2003. **9**(6): p. 651-656.
- 447 2. Vincent, Q.B., et al., *Clinical epidemiology of laboratory-confirmed Buruli ulcer in*  
448 *Benin: a cohort study*. Lancet Glob Health, 2014. **2**(7): p. e422-30.
- 449 3. Hayman, J. and A. McQueen, *The pathology of Mycobacterium ulcerans infection*.  
450 Pathology, 1985. **17**(4): p. 594-600.
- 451 4. Oliveira, M.S., et al., *Infection with Mycobacterium ulcerans induces persistent*  
452 *inflammatory responses in mice*. (0019-9567 (Print)).
- 453 5. Woodring, J.H., et al., *Update: the radiographic features of pulmonary tuberculosis*.  
454 American Journal of Roentgenology, 1986. **146**(3): p. 497-506.
- 455 6. van der Werf, T.S., et al., *Mycobacterium ulcerans infection*. Lancet, 1999. **354**(9183): p.  
456 1013-8.
- 457 7. Marsollier, L., et al., *Aquatic insects as a vector for Mycobacterium ulcerans*. Appl  
458 Environ Microbiol, 2002. **68**(9): p. 4623-8.
- 459 8. Meyers, W.M., et al., *Human Mycobacterium ulcerans infections developing at sites of*  
460 *trauma to skin*. Am J Trop Med Hyg, 1974. **23**(5): p. 919-23.
- 461 9. Stinear, T., et al., *Identification of Mycobacterium ulcerans in the environment from*  
462 *regions in Southeast Australia in which it is endemic with sequence capture-PCR*. Appl  
463 Environ Microbiol, 2000. **66**(8): p. 3206-13.
- 464 10. Michael, J.L., et al., *Epidemiology of Buruli Ulcer Infections, Victoria, Australia, 2011–*  
465 *2016*. Emerging Infectious Disease journal, 2018. **24**(11): p. 1988.
- 466 11. Organization, W.H. *Buruli ulcer - number of new reported cases*. Global Health  
467 Observatory data repository 2019 19 June 2019 [cited 2020 29 January]; Available from:  
468 <http://apps.who.int/gho/data/node.main.A1631>.
- 469 12. Simpson, H., et al., *Mapping the global distribution of Buruli ulcer: a systematic review*  
470 *with evidence consensus*. The Lancet Global Health, 2019. **7**(7): p. e912-e922.
- 471 13. Omansen, T.F., et al., *Global Epidemiology of Buruli Ulcer, 2010–2017, and Analysis of*  
472 *2014 WHO Programmatic Targets*. Emerging Infectious Diseases, 2019. **25**(12): p. 2183-  
473 2190.
- 474 14. Yerramilli, A., et al., *The location of Australian Buruli ulcer lesions—Implications for*  
475 *unravelling disease transmission*. PLOS Neglected Tropical Diseases, 2017. **11**(8): p.  
476 e0005800.
- 477 15. Sarfo, F.S., et al., *Clinical efficacy of combination of rifampin and streptomycin for*  
478 *treatment of Mycobacterium ulcerans disease*. Antimicrob Agents Chemother, 2010.  
479 **54**(9): p. 3678-85.
- 480 16. van der Werf, T.S., et al., *Mycobacterium ulcerans disease*. Bull World Health Organ,  
481 2005. **83**(10): p. 785-91.
- 482 17. Guarner, J., *Buruli Ulcer: Review of a Neglected Skin Mycobacterial Disease*. Journal of  
483 clinical microbiology, 2018. **56**(4): p. e01507-17.
- 484 18. Herbinger, K.H., et al., *Excision of Pre-Ulcerative Forms of Buruli Ulcer Disease: A*  
485 *Curative Treatment?* Infection, 2008.
- 486 19. Boyd, S.C., et al., *Epidemiology, clinical features and diagnosis of Mycobacterium*  
487 *ulcerans in an Australian population*. Med J Aust, 2012. **196**(5): p. 341-4.
- 488 20. Amofah, G., et al., *Buruli ulcer in Ghana: results of a national case search*. Emerg Infect  
489 Dis, 2002. **8**(2): p. 167-70.

- 490 21. Tanghe, A., et al., *Protective Efficacy of a DNA Vaccine Encoding Antigen 85A from*  
491 *Mycobacterium bovis BCG against Buruli Ulcer*. *Infect Immun*, 2001. **69**(9): p. 5403-  
492 5411.
- 493 22. Tanghe, A., et al., *A booster vaccination with Mycobacterium bovis BCG does not*  
494 *increase the protective effect of the vaccine against experimental Mycobacterium*  
495 *ulcerans infection in mice*. *Infect Immun*, 2007. **75**(5): p. 2642-4.
- 496 23. Phillips, R.O., et al., *Effectiveness of routine BCG vaccination on buruli ulcer disease: a*  
497 *case-control study in the Democratic Republic of Congo, Ghana and Togo*. *PLoS Negl*  
498 *Trop Dis*, 2015. **9**(1): p. e3457.
- 499 24. Group, T.U.B., *BCG vaccination against mycobacterium ulcerans infection (Buruli*  
500 *ulcer)*. *First results of a trial in Uganda*. *Lancet*, 1969. **293**(7586): p. 111-5.
- 501 25. Smith, P.G., et al., *The protective effect of BCG against Mycobacterium ulcerans disease:*  
502 *a controlled trial in an endemic area of Uganda*. *Trans R Soc Trop Med Hyg*, 1976.  
503 **70**(5-6): p. 449-57.
- 504 26. Tanghe, A., et al., *Improved protective efficacy of a species-specific DNA vaccine*  
505 *encoding mycolyl-transferase Ag85A from Mycobacterium ulcerans by homologous*  
506 *protein boosting*. *PLoS Negl Trop Dis*, 2008. **2**(3): p. e199.
- 507 27. Coutanceau, E., et al., *Immunogenicity of Mycobacterium ulcerans Hsp65 and protective*  
508 *efficacy of a Mycobacterium leprae Hsp65-based DNA vaccine against Buruli ulcer*.  
509 *Microbes Infect*, 2006. **8**(8): p. 2075-81.
- 510 28. Roupie, V., et al., *Analysis of the vaccine potential of plasmid DNA encoding nine*  
511 *mycolactone polyketide synthase domains in Mycobacterium ulcerans infected mice*.  
512 *PLoS Negl Trop Dis*, 2014. **8**(1): p. e2604.
- 513 29. Bolz, M., et al., *Use of Recombinant Virus Replicon Particles for Vaccination against*  
514 *Mycobacterium ulcerans Disease*. *PLoS Negl Trop Dis*, 2015. **9**(8): p. e0004011.
- 515 30. Bolz, M., et al., *Vaccination with the Surface Proteins MUL\_2232 and MUL\_3720 of*  
516 *Mycobacterium ulcerans Induces Antibodies but Fails to Provide Protection against*  
517 *Buruli Ulcer*. *PLoS Negl Trop Dis*, 2016. **10**(2): p. e0004431.
- 518 31. Fraga, A.G., et al., *Cellular immunity confers transient protection in experimental Buruli*  
519 *ulcer following BCG or mycolactone-negative Mycobacterium ulcerans vaccination*.  
520 *PLoS One*, 2012. **7**(3): p. e33406.
- 521 32. Watanabe, M., et al., *Protective effect of a dewaxed whole-cell vaccine against*  
522 *Mycobacterium ulcerans infection in mice*. *Vaccine*, 2015. **33**(19): p. 2232-9.
- 523 33. Hart, B.E., L.P. Hale, and S. Lee, *Immunogenicity and protection conferred by a*  
524 *recombinant Mycobacterium marinum vaccine against Buruli ulcer*. *Trials in*  
525 *Vaccinology*, 2016. **5**: p. 88-91.
- 526 34. Converse, P.J., et al., *BCG-mediated protection against Mycobacterium ulcerans*  
527 *infection in the mouse*. *PLoS Negl Trop Dis*, 2011. **5**(3): p. e985.
- 528 35. Hart, B.E., L.P. Hale, and S. Lee, *Recombinant BCG Expressing Mycobacterium*  
529 *ulcerans Ag85A Imparts Enhanced Protection against Experimental Buruli ulcer*. *PLoS*  
530 *Negl Trop Dis*, 2015. **9**(9): p. e0004046.
- 531 36. Hart, B.E. and S. Lee, *Overexpression of a Mycobacterium ulcerans Ag85B-EsxH Fusion*  
532 *Protein in Recombinant BCG Improves Experimental Buruli Ulcer Vaccine Efficacy*.  
533 *PLoS Negl Trop Dis*, 2016. **10**(12): p. e0005229.
- 534 37. Trigo, G., et al., *Phage therapy is effective against infection by Mycobacterium ulcerans*  
535 *in a murine footpad model*. *PLoS Negl Trop Dis*, 2013. **7**(4): p. e2183.



- 536 38. Siegrist, C.-A., 2 - *Vaccine Immunology*, in *Plotkin's Vaccines (Seventh Edition)*, S.A.  
537 Plotkin, et al., Editors. 2018, Elsevier. p. 16-34.e7.
- 538 39. Plotkin, S.A., *Vaccination against the major infectious diseases*. Comptes Rendus de  
539 l'Académie des Sciences - Series III - Sciences de la Vie, 1999. **322**(11): p. 943-951.
- 540 40. Pidot, S.J., et al., *Serological evaluation of Mycobacterium ulcerans antigens identified*  
541 *by comparative genomics*. PLoS Negl Trop Dis, 2010. **4**(11): p. e872.
- 542 41. Pidot, S.J., et al., *Regulation of the 18 kDa heat shock protein in Mycobacterium*  
543 *ulcerans: an alpha-crystallin orthologue that promotes biofilm formation*. Mol  
544 Microbiol, 2010. **78**(5): p. 1216-31.
- 545 42. Vettiger A, S.N., Ruf M-T, Röltgen K, Pluschke G., *Localization of Mycobacterial*  
546 *Antigens by Immunofluorescence Staining of Agarose Embedded Cells*. J Mycobact Dis.,  
547 2014. **4**(3): p. 150.
- 548 43. Dreyer, A., et al., *Identification of the Mycobacterium ulcerans protein MUL\_3720 as a*  
549 *promising target for the development of a diagnostic test for Buruli ulcer*. PLoS  
550 neglected tropical diseases, 2015. **9**(2): p. e0003477-e0003477.
- 551 44. Chua, B.Y., et al., *The use of a TLR2 agonist-based adjuvant for enhancing effector and*  
552 *memory CD8 T-cell responses*. Immunol Cell Biol, 2014. **92**(4): p. 377-83.
- 553 45. Chua, B.Y., et al., *Soluble proteins induce strong CD8+ T cell and antibody responses*  
554 *through electrostatic association with simple cationic or anionic lipopeptides that target*  
555 *TLR2*. J Immunol, 2011. **187**(4): p. 1692-701.
- 556 46. Chua, B.Y., et al., *Hepatitis C VLPs Delivered to Dendritic Cells by a TLR2 Targeting*  
557 *Lipopeptide Results in Enhanced Antibody and Cell-Mediated Responses*. PLOS ONE,  
558 2012. **7**(10): p. e47492.
- 559 47. Christiansen, D., et al., *Antibody Responses to a Quadrivalent Hepatitis C Viral-Like*  
560 *Particle Vaccine Adjuvanted with Toll-Like Receptor 2 Agonists*. Viral Immunology,  
561 2018. **31**(4): p. 338-343.
- 562 48. Wallace, J.R., et al., *Mycobacterium ulcerans low infectious dose and mechanical*  
563 *transmission support insect bites and puncturing injuries in the spread of Buruli ulcer*.  
564 PLoS Negl Trop Dis, 2017. **11**(4): p. e0005553.
- 565 49. Laemmli, U.K., *Cleavage of structural proteins during the assembly of the head of*  
566 *bacteriophage T4*. Nature, 1970. **227**(5259): p. 680-5.
- 567 50. Sekiya, T., et al., *PEGylation of a TLR2-agonist-based vaccine delivery system improves*  
568 *antigen trafficking and the magnitude of ensuing antibody and CD8(+) T cell responses*.  
569 Biomaterials, 2017. **137**(1878-5905 (Electronic)): p. 61-72.
- 570 51. Wijayadikusumah, A.R., et al., *Structure-function relationships of protein-lipopeptide*  
571 *complexes and influence on immunogenicity*. Amino Acids, 2017. **49**(10): p. 1691-1704.
- 572 52. Wijayadikusumah, A.R., *An evaluation of charged Pam2Cys-based lipopeptides as novel*  
573 *adjuvants for subunit-based vaccines*. 2017.
- 574 53. Tan, A.C., et al., *Intranasal Administration of the TLR2 Agonist Pam2Cys Provides*  
575 *Rapid Protection against Influenza in Mice*. Mol Pharm, 2012.
- 576 54. Mifsud, E.J., et al., *Reducing the impact of influenza-associated secondary pneumococcal*  
577 *infections*. Immunol Cell Biol, 2016. **94**(1): p. 101-8.
- 578 55. Lu, L.L., et al., *A Functional Role for Antibodies in Tuberculosis*. Cell, 2016. **167**(2): p.  
579 433-443 e14.
- 580 56. Damelang, T., et al., *Role of IgG3 in Infectious Diseases*. Trends Immunol, 2019. **40**(3):  
581 p. 197-211.

- 582 57. Chung, A.W., et al., *Dissecting Polyclonal Vaccine-Induced Humoral Immunity against*  
583 *HIV Using Systems Serology*. Cell, 2015. **163**(4): p. 988-98.
- 584 58. Maglione, P.J., J. Xu, and J. Chan, *B cells moderate inflammatory progression and*  
585 *enhance bacterial containment upon pulmonary challenge with Mycobacterium*  
586 *tuberculosis*. J Immunol, 2007. **178**(11): p. 7222-34.
- 587 59. Phuah, J., et al., *Effects of B Cell Depletion on Early Mycobacterium tuberculosis*  
588 *Infection in Cynomolgus Macaques*. Infect Immun, 2016. **84**(5): p. 1301-1311.
- 589 60. McLean, M.R., et al., *Dimeric Fcγ Receptor Enzyme-Linked Immunosorbent Assay*  
590 *To Study HIV-Specific Antibodies: A New Look into Breadth of Fcγ Receptor*  
591 *Antibodies Induced by the RV144 Vaccine Trial*. J Immunol, 2017. **199**(2): p. 816-826.
- 592 61. George, K.M., et al., *Mycolactone: a polyketide toxin from Mycobacterium ulcerans*  
593 *required for virulence*. Science, 1999. **283**(5403): p. 854-7.
- 594 62. Boulkroun, S., et al., *Mycolactone suppresses T cell responsiveness by altering both early*  
595 *signaling and posttranslational events*. J Immunol, 2010. **184**(3): p. 1436-44.
- 596 63. Baron, L., et al., *Mycolactone subverts immunity by selectively blocking the Sec61*  
597 *translocon*. J Exp Med, 2016. **213**(13): p. 2885-2896.
- 598 64. Ogbechi, J., et al., *Inhibition of Sec61-dependent translocation by mycolactone uncouples*  
599 *the integrated stress response from ER stress, driving cytotoxicity via translational*  
600 *activation of ATF4*. Cell Death & Disease, 2018. **9**(3): p. 397.
- 601 65. Guenin-Mace, L., et al., *Mycolactone impairs T cell homing by suppressing microRNA*  
602 *control of L-selectin expression*. Proc Natl Acad Sci U S A, 2011. **108**(31): p. 12833-8.
- 603 66. Shinoda, N., H. Nakamura, and M. Watanabe, *Suppressive effect of mycolactone-*  
604 *containing fraction from Mycobacterium ulcerans on antibody production against co-*  
605 *administered antigens*. Biomedical Research and Clinical Practice, 2017. **2**(1): p. 1-6.
- 606 67. Schroeder, H.W., Jr. and L. Cavacini, *Structure and function of immunoglobulins*. The  
607 Journal of allergy and clinical immunology, 2010. **125**(2 Suppl 2): p. S41-S52.
- 608 68. Sibénil, S., et al., *FcγR: The key to optimize therapeutic antibodies?* Critical Reviews in  
609 Oncology/Hematology, 2007. **62**(1): p. 26-33.
- 610 69. Sousa, A.O., et al., *IgG subclass distribution of antibody responses to protein and*  
611 *polysaccharide mycobacterial antigens in leprosy and tuberculosis patients*. Clinical and  
612 experimental immunology, 1998. **111**(1): p. 48-55.
- 613 70. Omansen, T.F., et al., *In Vivo Imaging of Bioluminescent Mycobacterium ulcerans: A*  
614 *Tool to Refine the Murine Buruli Ulcer Tail Model*. The American Journal of Tropical  
615 Medicine and Hygiene, 2019. **101**(6): p. 1312-1321.
- 616 71. Loftus, M.J., et al., *The incubation period of Buruli ulcer (Mycobacterium ulcerans*  
617 *infection) in Victoria, Australia - Remains similar despite changing geographic*  
618 *distribution of disease*. PLoS Negl Trop Dis, 2018. **12**(3): p. e0006323.
- 619 72. Fyfe, J.A., et al., *A major role for mammals in the ecology of Mycobacterium ulcerans*.  
620 PLoS Negl Trop Dis, 2010. **4**(8): p. e791.
- 621 73. Williamson, H.R., et al., *Detection of Mycobacterium ulcerans in the Environment*  
622 *Predicts Prevalence of Buruli Ulcer in Benin*. PLOS Neglected Tropical Diseases, 2012.  
623 **6**(1): p. e1506.
- 624 74. Marion, E., et al., *Seasonal and regional dynamics of M. ulcerans transmission in*  
625 *environmental context: deciphering the role of water bugs as hosts and vectors*. PLoS  
626 neglected tropical diseases, 2010. **4**(7): p. e731-e731.



- 627 75. Johnson, P.D., et al., *Mycobacterium ulcerans* in mosquitoes captured during outbreak of  
628 *Buruli ulcer, southeastern Australia*. Emerg Infect Dis, 2007. **13**(11): p. 1653-60.  
629  
630

## 631 Figures

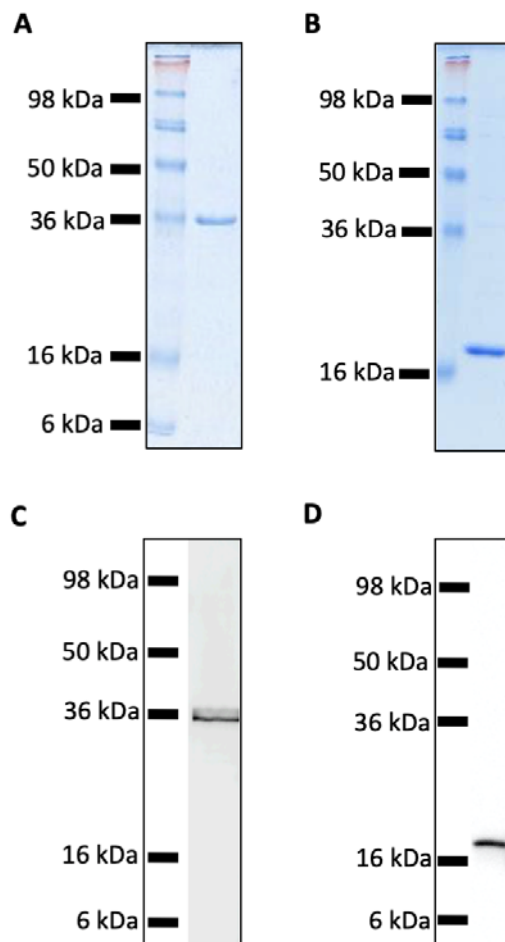

632  
633  
634 **Figure 1. SDS-PAGE and Western Blot Analysis of purified recombinant MUL\_3720 and**  
635 **Hsp18 proteins.** (A) SDS-PAGE of MUL\_3720 protein elution (containing 10  $\mu$ g protein)  
636 shows a band ~36 kDa. (B) SDS-PAGE of Hsp18 protein elution (containing 10  $\mu$ g protein)  
637 shows a band ~18 kDa. (C) Protein in the final MUL\_3720 elute was analysed by Western Blot  
638 using an anti-6xHIS-tag antibody to detect the presence of a single band corresponding to the  
639 band as the SDS- PAGE analysis. (D) Protein in the final Hsp18 elute was analysed by Western  
640 Blot using an anti-6xHIS-tag antibody to detect the presence of a single band corresponding to  
641 the 18 kDa band as the SDS-PAGE analysis.

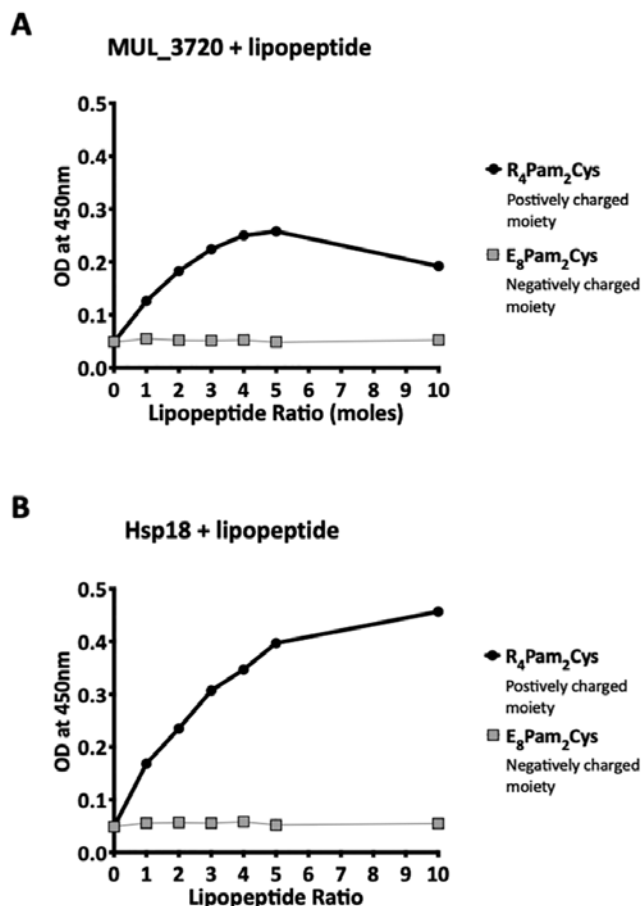

642

643 **Figure 2. Recombinant MUL\_3720 and Hsp18 protein formulation linked with R<sub>4</sub>Pam<sub>2</sub>Cys.**

644 To analyse the formation of antigen-lipopeptide complexes, a constant amount of antigen (**A**)  
645 MUL\_3720 (25µg) and (**B**) Hsp18 (25µg) was mixed with lipopeptide at different  
646 protein:lipopeptide molar ratios in 50 µl of PBS. These graphs depict the absorbance values of  
647 these solutions at an optical density of 450nm (OD<sub>450</sub>). In these assays either R<sub>4</sub>Pam<sub>2</sub>Cys or  
648 E<sub>8</sub>Pam<sub>2</sub>Cys lipopeptides were added to the proteins at increasing amounts. The addition of  
649 R<sub>4</sub>Pam<sub>2</sub>Cys is depicted with black circles and the addition of E<sub>8</sub>Pam<sub>2</sub>Cys is depicted with grey  
650 squares. An increase in absorbance in correlation to an increase in lipopeptide was indicative of  
651 protein binding to lipopeptide.

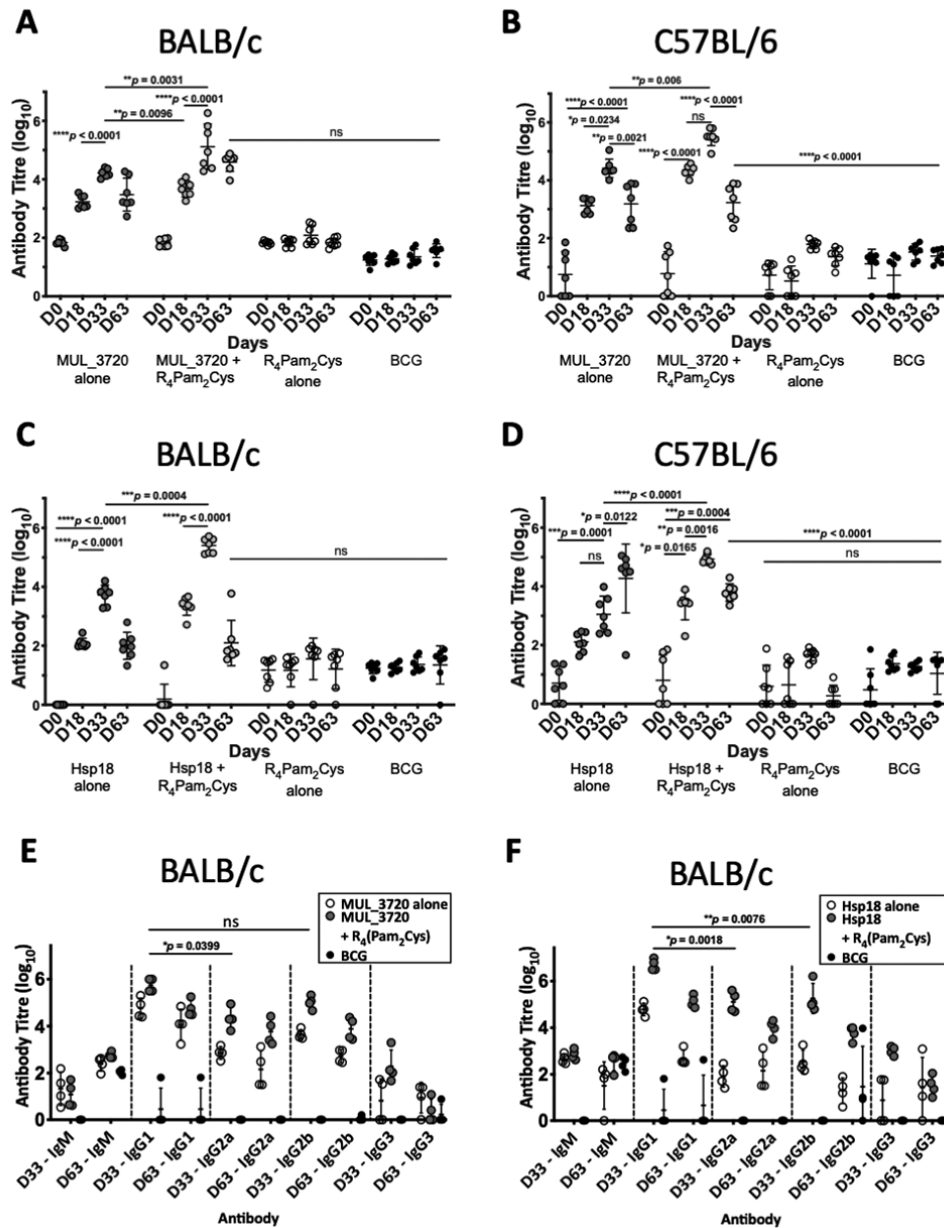

652 **Figure 3. Antibody titres from BALB/c and C57BL/6 mice immunized with recombinant**  
 653 **MUL\_3720 or Hsp18 linked to R<sub>4</sub>Pam<sub>2</sub>Cys lipopeptide adjuvant. MUL\_3720-specific**  
 654 **antibody titres from (A) BALB/c and (B) C57BL/6 mice. Mice were vaccinated with protein**  
 655 **alone (MUL\_3720) (grey circles), recombinant protein + R<sub>4</sub>Pam<sub>2</sub>Cys (blue circles), R<sub>4</sub>Pam<sub>2</sub>Cys**  
 656 **alone (clear circles) and *M. bovis* BCG (black circles). A separate ELISA was performed to**  
 657 **measure Hsp18-specific antibody titres in (C) BALB/c and (D) C57BL/6 mice. Mice were**

658 vaccinated with protein alone (Hsp18) (grey circles), recombinant protein + R<sub>4</sub>Pam<sub>2</sub>Cys (blue  
659 circles), R<sub>4</sub>Pam<sub>2</sub>Cys alone (clear circles) and *M. bovis* BCG (black circles). IgG isotypes (IgG<sub>1</sub>,  
660 IgG<sub>2a</sub>, IgG<sub>2b</sub> and IgG<sub>3</sub>) were quantified from BALB/c mice immunized with (E) MUL\_3720 +  
661 R<sub>4</sub>Pam<sub>2</sub>Cys and (F) Hsp18 + R<sub>4</sub>Pam<sub>2</sub>Cys. Mice were vaccinated with protein antigen alone  
662 (either MUL\_3720 or Hsp18) (clear circles), protein + R<sub>4</sub>Pam<sub>2</sub>Cys (grey circles) and BCG (black  
663 circles). Results are shown as zero if below detectable limits. The null hypothesis (no difference  
664 in mean antibody responses between treatment groups) was rejected at \**p* < 0.05, \*\**p* < 0.01,  
665 \*\*\**p* < 0.001 or \*\*\*\**p* < 0.0001. The error bars represent standard deviation (n=7).  
666  
667

### Stages of *M. ulcerans* tail infection

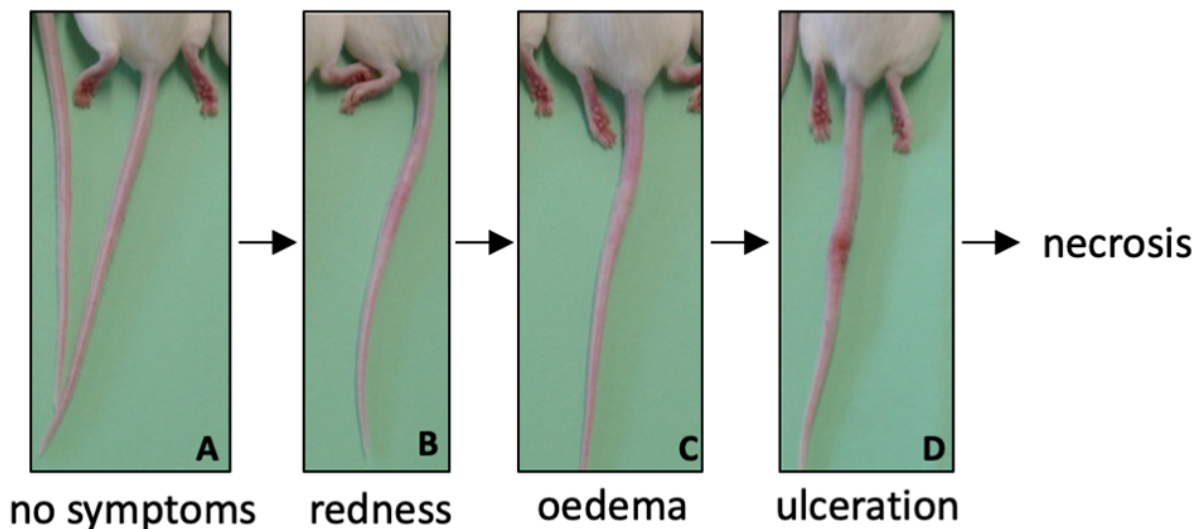

668 **Figure 4. Progression of BU in the murine tail infection model over time.** (A) Healthy mouse  
669 tail. (B) Appearance of a small sign of redness at the site of tail infection. (C) Oedema  
670 surrounding the initial site of redness. (D) Tail lesion at the point of ulceration. This is typically

671 identified by excessive oedema and redness at the site of imminent ulceration. Mice were culled  
672 before ulcerative lesions appeared.

673

674

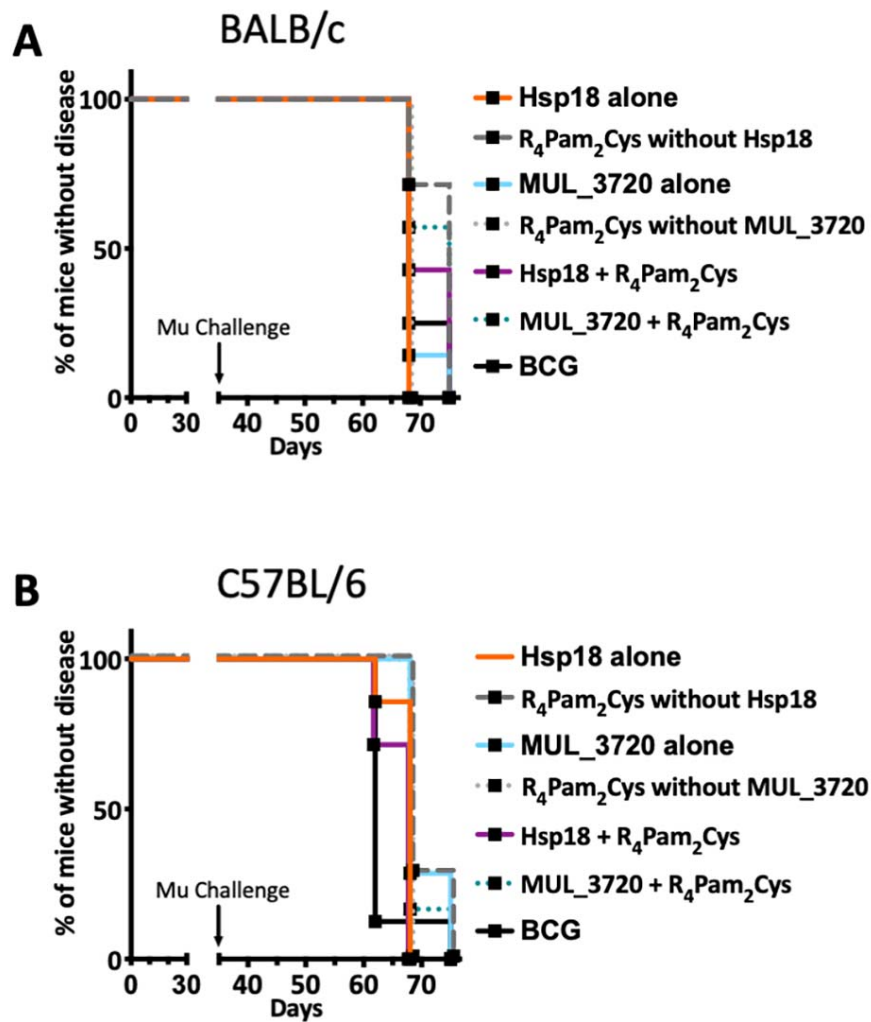

675

676 **Figure 5. Vaccine performance using murine tail infection model of BU.**

677 Survival analysis showing the time taken (days) for each mouse to reach ulceration for different

678 vaccination groups post *M. ulcerans* challenge. (A) BALB/c mice (n=7) and (B) C57BL/6 mice

679 (n=7). The null hypothesis (no difference in mean antibody responses between treatment groups)  
680 was rejected if  $*p < 0.05$ ,  $**p < 0.01$ ,  $***p < 0.001$  or  $****p < 0.0001$ .  
681

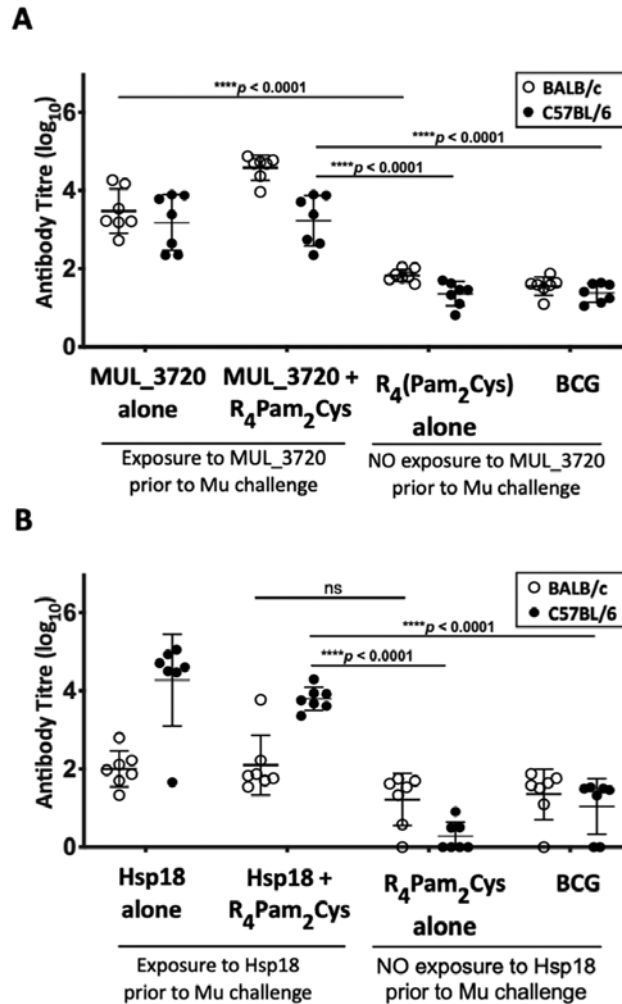

682

683 **Figure 6. Antibody responses to recombinant MUL\_3720 and Hsp18 in unvaccinated mice.**

684 (A) MUL\_3720-specific antibody titres and (B) Hsp18-specific antibody titres from BALB/c  
685 mice (clear circles) and C57BL/6 mice (black circles) at day 63 (post-MU exposure). The null  
686 hypothesis (no difference in mean antibody responses between treatment groups) was rejected if

687 \* $p < 0.05$ , \*\* $p < 0.01$ , \*\*\* $p < 0.001$  or \*\*\*\* $p < 0.0001$ . The error bars are standard deviation  
688 (n=7).
